# Supplementary material for: Mood instability is a common feature of mental health disorders and is associated with poor clinical outcomes
Source: HighWire-hosted journal article supplement (doi:10.1136/bmjopen-2014-007504), 2015-05-01

## Title

Mood instability is a common feature of mental health disorders and is associated with poor clinical outcomes

## Authors

Rashmi Patel<sup>1</sup>, Theodore Lloyd<sup>1</sup>, Richard Jackson<sup>2</sup>, Michael Ball<sup>2</sup>, Hitesh Shetty<sup>3</sup>, Matthew Broadbent<sup>3</sup>, John R Geddes<sup>4</sup>, Robert Stewart<sup>2</sup>, Philip McGuire<sup>1</sup> and Matthew Taylor<sup>1</sup>

## Supplementary material

### Supplementary Table 1

Modifier words entered into natural language processing applications

| <b>Mood</b>                           | <b>Affect</b> | <b>Emotion</b>          |
|---------------------------------------|---------------|-------------------------|
| change                                | change        | changes                 |
| changeable                            | changes       | difficulties regulating |
| changable (misspelling of changeable) | labile        | displays of             |
| changes                               | lability      | dysregulation           |
| chaotic                               | range         | extremes                |
| extremes                              | variable      | lability                |
| fluctuate                             |               | levels                  |
| fluctuated                            |               | outbursts of            |
| fluctuates                            |               | range                   |
| fluctuating                           |               | regulation difficulties |
| fluctuation                           |               | unstable                |
| fluctuations                          |               | waves of                |
| instability                           |               |                         |
| labile                                |               |                         |
| lability                              |               |                         |
| liability (misspelling of lability)   |               |                         |
| liable (misspelling of labile)        |               |                         |
| rapid cycling                         |               |                         |
| swings                                |               |                         |
| unpredictable                         |               |                         |
| unsettled                             |               |                         |
| unstable                              |               |                         |
| variable                              |               |                         |
| variation                             |               |                         |
| variations                            |               |                         |
| volatile                              |               |                         |

Mood instability is a common feature of mental health disorders and is associated with poor clinical outcomes

### Supplementary Table 2

| Inter-annotator reliability for gold standard annotations for natural language processing applications |                           |                               |                                 |                                          |                               |                     |
|--------------------------------------------------------------------------------------------------------|---------------------------|-------------------------------|---------------------------------|------------------------------------------|-------------------------------|---------------------|
| NLP application                                                                                        | Reference annotations (n) | Training data annotations (n) | Active learning annotations (n) | Total sentences in BRC Case Register (n) | Inter-annotator agreement (%) | Cohen's kappa value |
| Mood                                                                                                   | 313                       | 300                           | 395                             | 386,386                                  | 92.0                          | 0.84                |
| Affect                                                                                                 | 317                       | 501                           | 300                             | 32,132                                   | 92.7                          | 0.82                |
| Emotion                                                                                                | 320                       | 300                           | 605                             | 103,894                                  | 90.6                          | 0.80                |

### Supplementary Table 3

| Performance of natural language processing applications |           |        |                           |        |
|---------------------------------------------------------|-----------|--------|---------------------------|--------|
| NLP application                                         | Baseline  |        | Confidence Filter Applied |        |
|                                                         | Precision | Recall | Precision                 | Recall |
| Mood Instability                                        | 84.2%     | 84.2%  | 90.5%                     | 72.5%  |
| Affective Instability                                   | 82.0%     | 55.6%  | 91.1%                     | 45.6%  |
| Emotional Instability                                   | 84.8%     | 86.6%  | 90.8%                     | 60.8%  |

Mood instability is a common feature of mental health disorders and is associated with poor clinical outcomes

## Supplementary Table 4

| Binary logistic regression analysis of factors associated with mood instability with missing data not included (n = 23,584) |                                         |                  |                                                              |                                   |         |                     |         |
|-----------------------------------------------------------------------------------------------------------------------------|-----------------------------------------|------------------|--------------------------------------------------------------|-----------------------------------|---------|---------------------|---------|
| Factor                                                                                                                      | Group                                   | Number in sample | Prevalence of documented mood instability within 1 month (%) | Association with mood instability |         |                     |         |
|                                                                                                                             |                                         |                  |                                                              | Unadjusted                        |         | Adjusted model*     |         |
|                                                                                                                             |                                         |                  |                                                              | Odds ratio (95% CI)               | p value | Odds ratio (95% CI) | p value |
| Age (years)                                                                                                                 | 16-25                                   | 7133             | 16.3                                                         | 1.28 (1.17-1.40)                  | <0.001  | 1.27 (1.15-1.41)    | <0.001  |
|                                                                                                                             | 26-35                                   | 7842             | 13.2                                                         | Reference                         |         | Reference           |         |
|                                                                                                                             | 36-45                                   | 6611             | 9.8                                                          | 0.71 (0.64-0.79)                  | <0.001  | 0.73 (0.65-0.81)    | <0.001  |
|                                                                                                                             | 46-55                                   | 4066             | 9.1                                                          | 0.65 (0.58-0.74)                  | <0.001  | 0.65 (0.56-0.74)    | <0.001  |
|                                                                                                                             | 56-65                                   | 2052             | 7.1                                                          | 0.50 (0.42-0.60)                  | <0.001  | 0.49 (0.40-0.59)    | <0.001  |
| Gender                                                                                                                      | Male                                    | 12532            | 10.9                                                         | 0.81 (0.75-0.87)                  | <0.001  | 0.74 (0.68-0.81)    | <0.001  |
|                                                                                                                             | Female                                  | 15172            | 13.2                                                         | Reference                         |         | Reference           |         |
| Ethnicity                                                                                                                   | White                                   | 15691            | 12.5                                                         | Reference                         |         | Reference           |         |
|                                                                                                                             | Asian                                   | 1511             | 12.6                                                         | 1.01 (0.86-1.18)                  | 0.94    | 0.92 (0.78-1.09)    | 0.34    |
|                                                                                                                             | Black                                   | 5203             | 13.3                                                         | 1.07 (0.98-1.18)                  | 0.15    | 0.99 (0.89-1.09)    | 0.80    |
|                                                                                                                             | Other                                   | 5299             | 9.8                                                          | 0.76 (0.69-0.84)                  | <0.001  | 0.82 (0.73-0.93)    | <0.001  |
| Marital status (first recorded)                                                                                             | Married/cohabiting                      | 5115             | 11.7                                                         | 0.88 (0.80-0.97)                  | 0.010   | 1.16 (1.04-1.28)    | 0.009   |
|                                                                                                                             | Divorced/separated                      | 2391             | 11.1                                                         | 0.82 (0.72-0.94)                  | 0.005   | 1.17 (1.01-1.35)    | 0.04    |
|                                                                                                                             | Single                                  | 16078            | 13.1                                                         | Reference                         |         | Reference           |         |
| Diagnosis                                                                                                                   | Schizophrenia and related               | 5860             | 15.5                                                         | 2.11 (1.92-2.32)                  | <0.001  | 2.27 (2.04-2.52)    | <0.001  |
|                                                                                                                             | Bipolar affective disorder              | 2691             | 22.6                                                         | 3.37 (3.03-3.76)                  | <0.001  | 3.35 (2.98-3.77)    | <0.001  |
|                                                                                                                             | Psychotic Depression                    | 767              | 14.0                                                         | 1.87 (1.51-2.31)                  | <0.001  | 2.03 (1.62-2.55)    | <0.001  |
|                                                                                                                             | Personality Disorder                    | 2311             | 17.8                                                         | 2.50 (2.21-2.82)                  | <0.001  | 2.43 (2.13-2.78)    | <0.001  |
|                                                                                                                             | Unipolar Depression (without psychosis) | 14192            | 8.0                                                          | Reference                         |         | Reference           |         |
|                                                                                                                             | Other Affective Disorder                | 1883             | 10.6                                                         | 1.36 (1.16-1.60)                  | <0.001  | 1.39 (1.17-1.65)    | <0.001  |

\*Results adjusted for all the factors reported in this table; 4,120 cases with no recorded data on marital status were dropped.

Mood instability is a common feature of mental health disorders and is associated with poor clinical outcomes

### Supplementary Table 5

Multivariable zero-inflated negative binomial regression analysis of association between documented mood instability and number of hospital admissions during follow-up period

| Follow-up period                                                                    | Number of hospital admissions<br>Incidence rate ratio (95% CI, p value) | Vuong test<br>p value |
|-------------------------------------------------------------------------------------|-------------------------------------------------------------------------|-----------------------|
| 0-12 months, n=27704                                                                | Did not converge                                                        |                       |
| 0-24 months, n=24848                                                                | 1.87 (1.71-2.05), p<0.001                                               | 0.001                 |
| 0-36 months, n=21188                                                                | 1.77 (1.61-1.96), p<0.001                                               | 0.003                 |
| 0-48 months, n=17130                                                                | 1.80 (1.61-2.02), p<0.001                                               | 0.04                  |
| 0-60 months, n=13032                                                                | 1.78 (1.56-2.03), p<0.001                                               | 0.14                  |
| Results adjusted for age, gender, ethnicity, marital status and psychotic diagnosis |                                                                         |                       |

### Supplementary Figure 1

Definition of precision and recall statistics for assessing performance of NLP applications

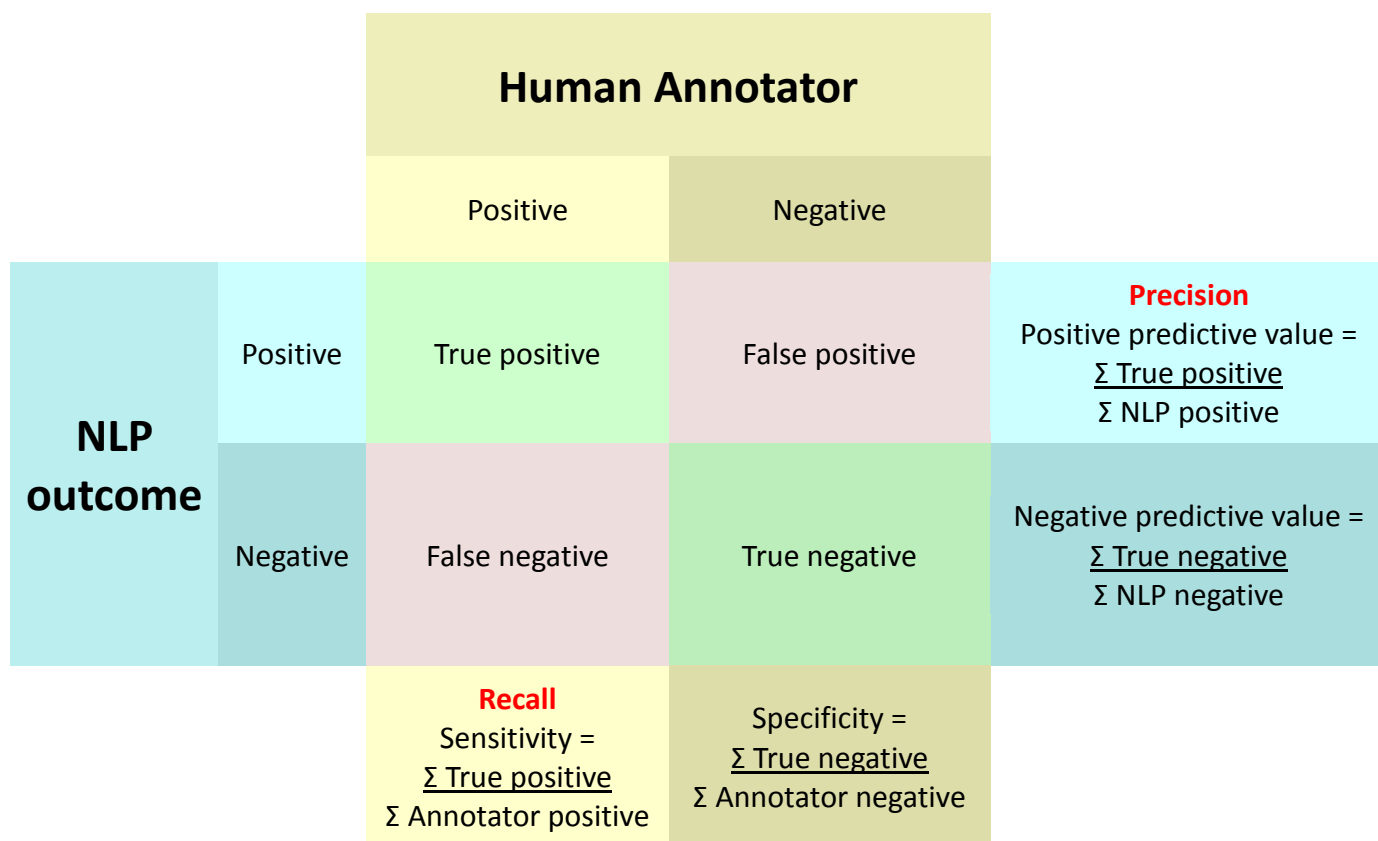

Supplement: bmjopen-2014-007504supp.pdf [file bmjopen-2014-007504supp.pdf]
